# Supplementary material for: Microenvironmental IL1β promotes breast cancer metastatic colonisation in the bone via activation of Wnt signalling
Source: PubMed Central journal article supplement (PMC6825219; doi:10.1038/s41467-019-12807-0), 2019-11-01
Supplement: 41467_2019_12807_MOESM1_ESM.pdf [file 41467_2019_12807_MOESM1_ESM.pdf]

# Microenvironmental IL1 $\beta$ promotes breast cancer metastatic colonisation in the bone via activation of Wnt signalling

Eyre et al 2019

Supplementary Information

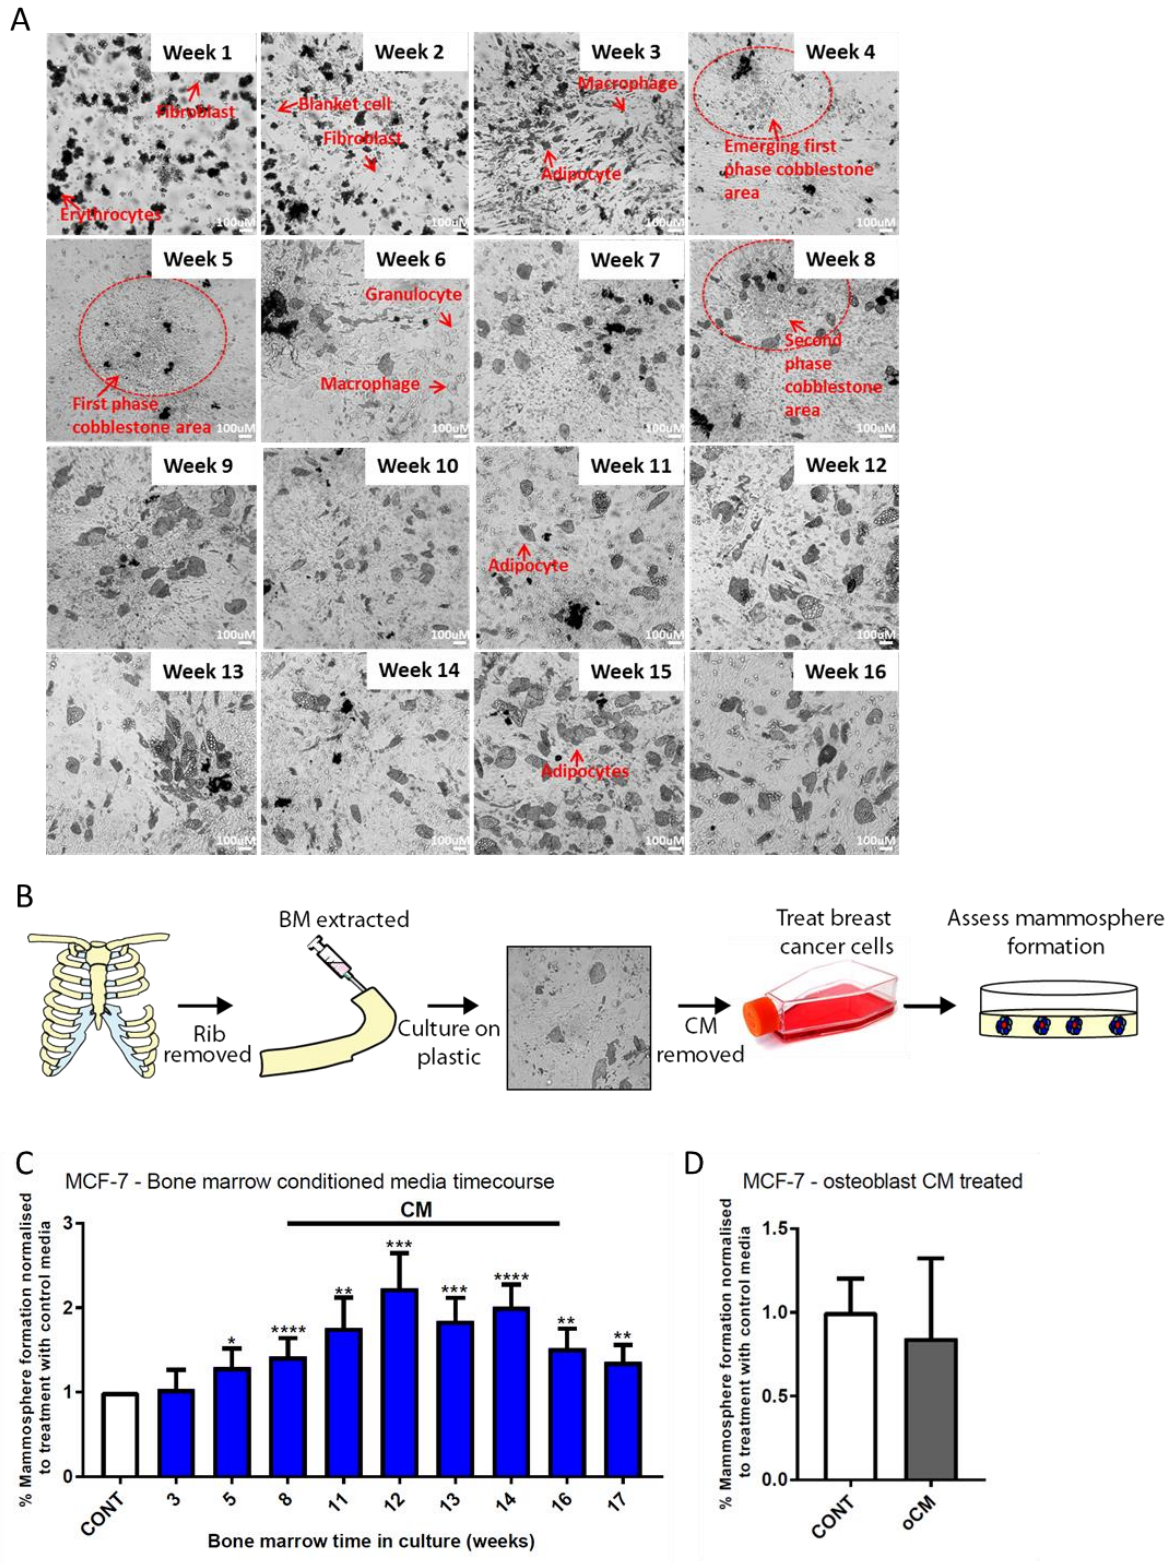

**Supplementary Figure 1: Bone marrow derived factors promote breast CSC colony formation.**

(A) Bone marrow growth images. Bone marrow was extracted from patient rib bones and cultured continuously on plastic. This is a dynamic culture system, with bone marrow cell composition changing over time. In the immediate stages following extraction (Week 1) large clumps of

erythrocytes are seen, these gradually die as the culture progresses. At Week 2 of culture fibroblasts develop, and haematopoietic progenitor cells home to these. By Week 4 bone marrow stroma is intact and the bone marrow undergoes a first phase of haematopoiesis from late haematopoietic cells. This is demonstrated by cobblestone areas, which in turn produce macrophages and granulocytes (Week 6). At Week 8 a second phase of haematopoiesis, from early progenitor cells, takes place. This produces granulocyte-macrophage progenitors, which secrete growth factors into the media. Haematopoietic cobblestone areas are maintained until approximately Week 11, with their growth supplemented by adipocytes. From Week 11 cobblestone areas begin to break down, and by Week 14 the culture is dominated by stroma, macrophages and adipocytes. Scale bar 100µM.

(B) Workflow schematic. Rib bones were removed from patients undergoing access surgery for non-malignant renal failure. Bone marrow was extracted and cultured on plastic without passage for 20 weeks, with conditioned media (CM) removed weekly. Breast cancer cells in culture were treated with CM from bone marrow, and CSC colony forming activity assessed by mammosphere formation.

(C) Conditioned media taken from bone marrow cultured for 3 weeks did not stimulate mammosphere colony formation in MCF-7 cells, whereas conditioned media from bone marrow cultured from 5-17 weeks significantly stimulated mammosphere formation. The largest increase in mammosphere formation was seen with conditioned media from weeks 8-16, therefore this was used for future experiments. Data is presented as fold change in percentage mammosphere formation following treatment with CM, normalised to treatment with control media for each time point.

(D) Conditioned media from the osteoblast cell line hFOB1.19 (oCM) did not stimulate mammosphere colony formation in MCF7 cells. Data is presented as percentage mammosphere formation normalised to treatment with control media. All graphs represent mean±SEM, \*p<0.05, \*\*p<0.01, \*\*\*p<0.001, \*\*\*\*p<0.0001.

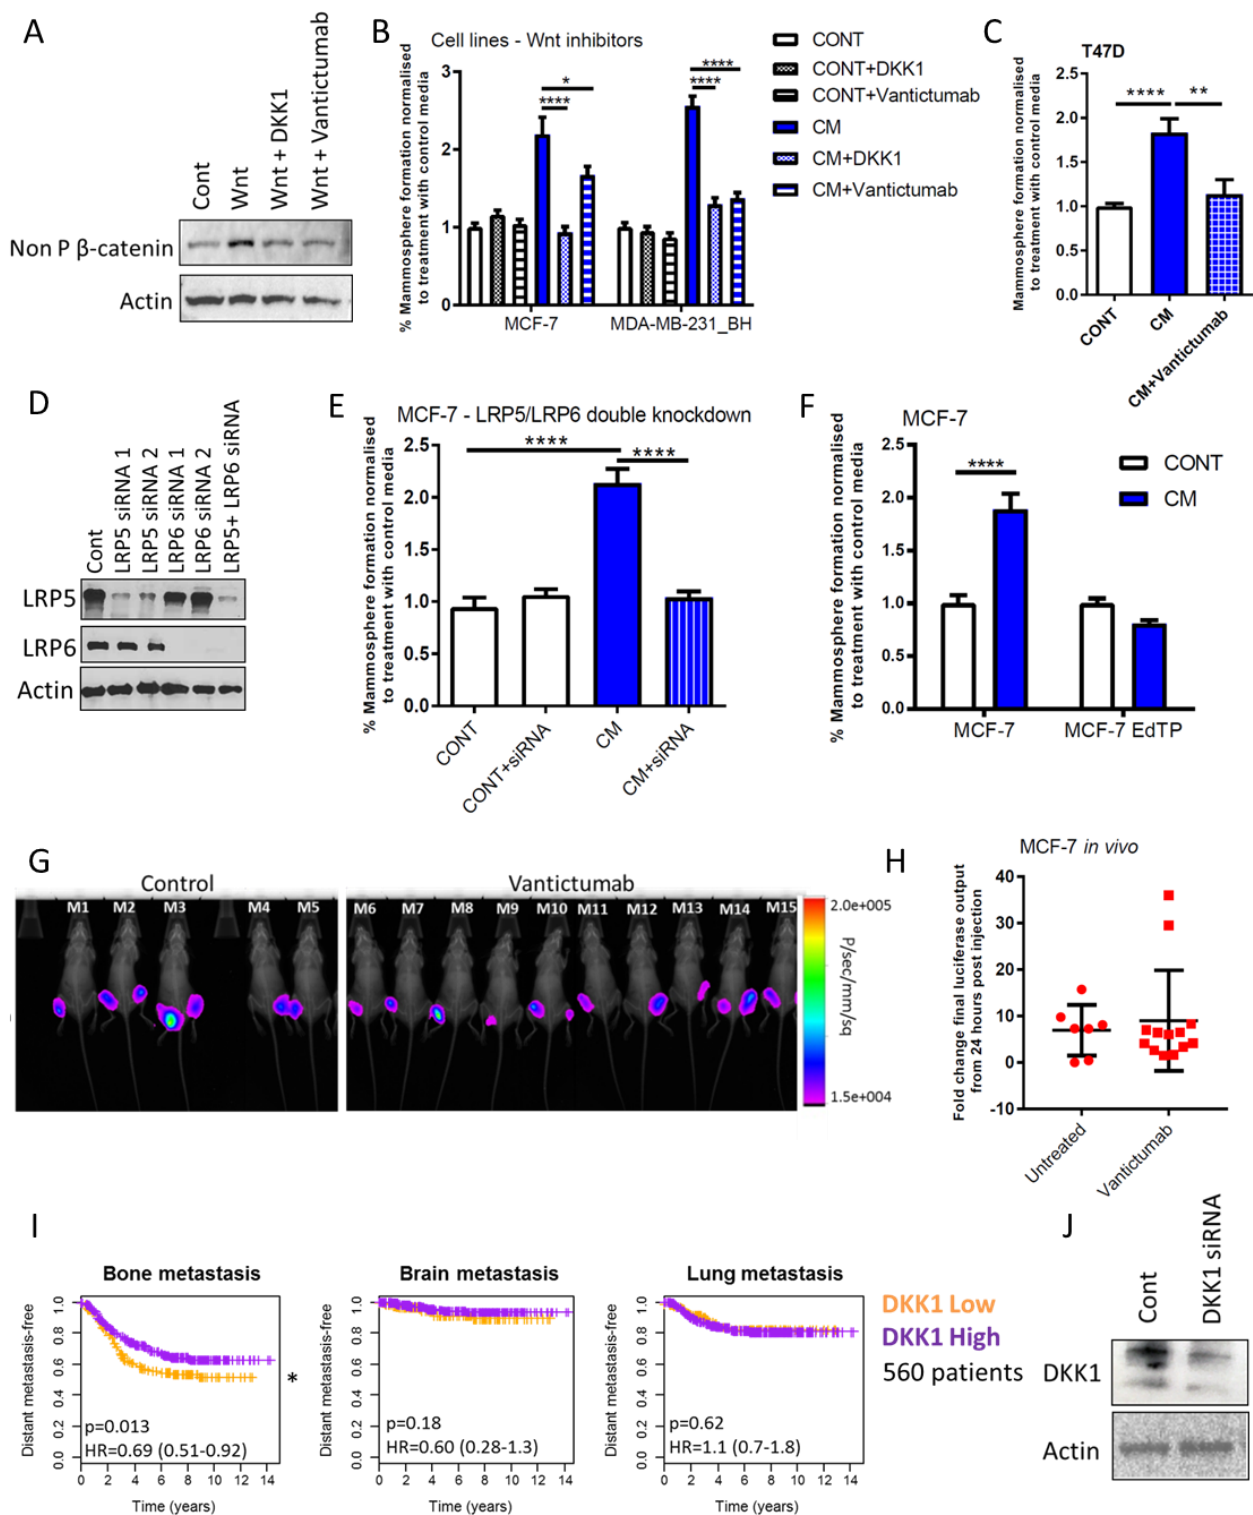

**Supplementary Figure 2: CSC colony formation in response to bone marrow secreted factors is mediated by Wnt signalling.** (A) 4 hours treatment with 100nm Wnt3A increased active  $\beta$ -catenin protein expression in 293T cells. This could be reversed by treatment with Wnt inhibitors DKK1 (50ng/ml) and Vantictumab (50 $\mu$ g/ml). (B) Inhibition of Wnt signalling with 50ng/ml DKK1 or

50µg/ml Vantictumab reversed the induction of mammosphere colony formation by bone marrow CM in MCF-7 and MDA-MV-231\_BH cell lines. Inhibition of Wnt signalling did not reduce mammosphere formation in cells treated with control media. (C) Inhibition of Wnt signalling with 50µg/ml Vantictumab reversed the induction of mammosphere colony formation by bone marrow CM in the T47D cell line. (D) The LRP5 and LRP6 receptors could be knocked down specifically both alone and in combination following treatment with 25nM siRNA for 72 hours (combination shown is LRP5 siRNA1 and LRP6 siRNA 2). (E) Combination knockdown of LRP5 and LRP6 in MCF-7 cells prior to treatment with CM abrogated the effect of CM on mammosphere formation. (F) MCF-7 cells with a dominant negative TCF7 rendered incapable of Wnt signalling (MCF-7 EdTP) did not respond to CM with increased mammosphere formation. (G) Tumours cells were present in 7/10 (70%) of femurs in control mice and 13/20 (65%, no significant difference) of Vantictumab treated mice 24 hours following intra-femoral injection of  $1 \times 10^5$  MCF-7 cells. (H) Luciferase signal output in control and Vantictumab treated mice at experiment termination was not significantly different. Individual data points represent individual femurs. (I) Survival analysis based on DKK1 expression (absent/marginal (orange) vs present (purple)) from 3 published datasets (EMC192, EMC286, MSK82). Absent/marginal DKK1 expression in primary breast cancers was associated with poor outcomes in patients with bone metastasis, but not lung or brain metastases. HR; Hazard ratio. (J) DKK1 protein could be knocked down in MDA-MB-231 cells for 72 hours using 25nM siRNA. All graphs represent mean±SEM. \*p<0.05, \*\*p<0.01, \*\*\*p<0.001, \*\*\*\*p<0.0001.

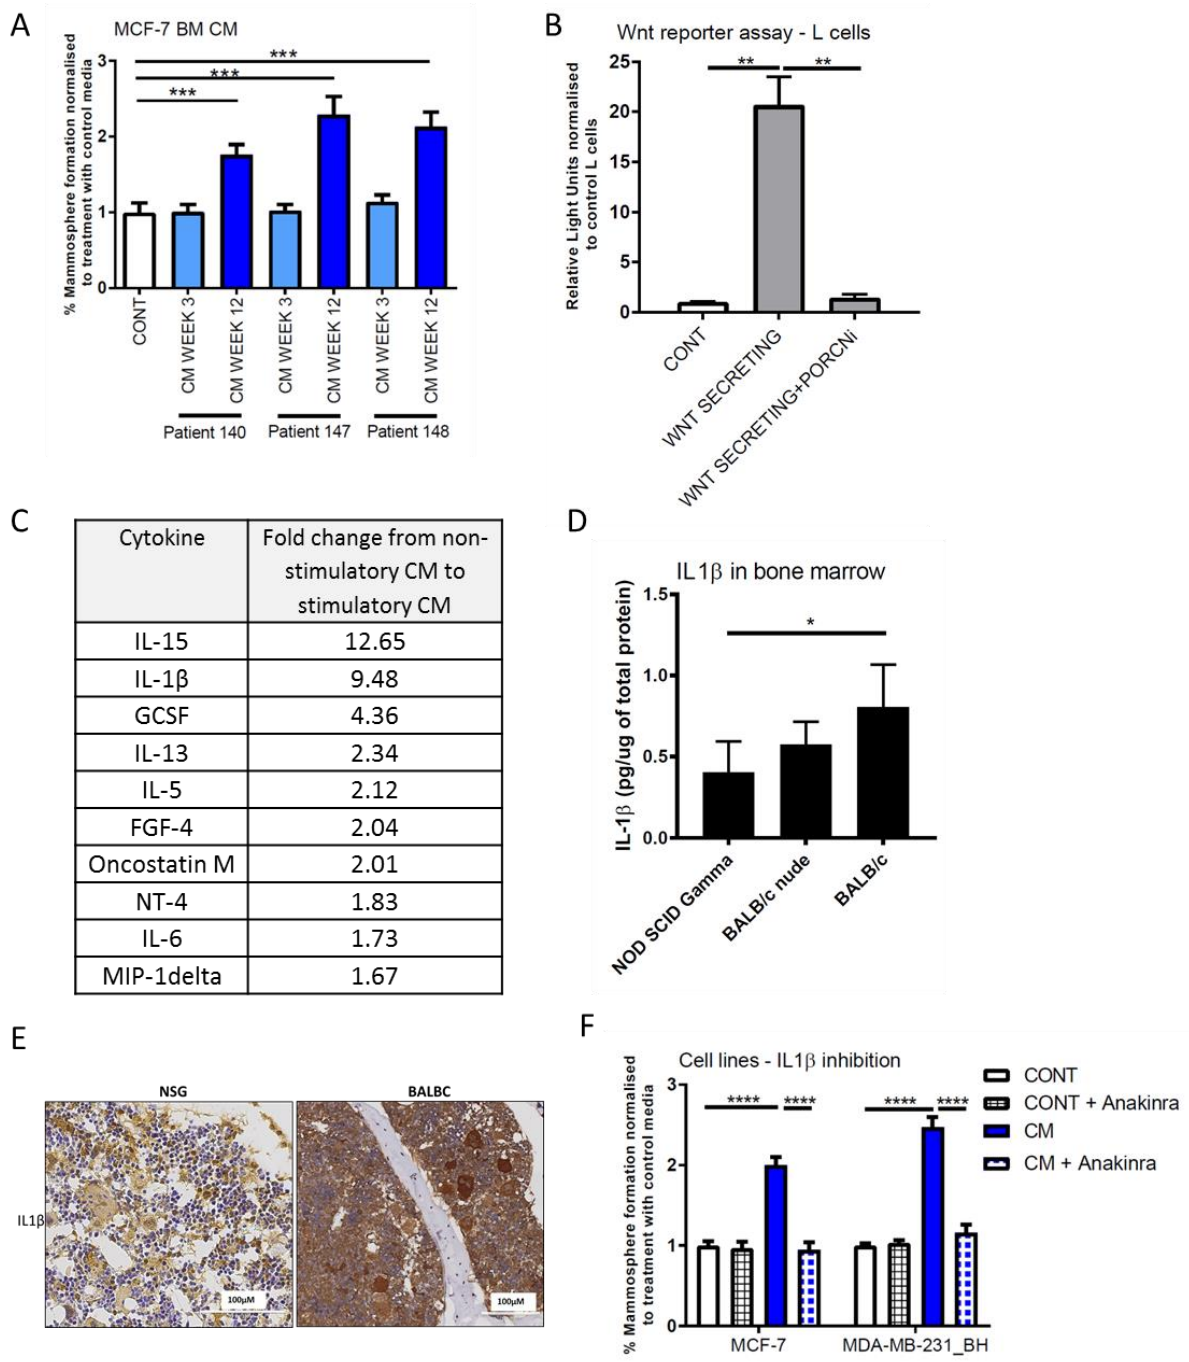

**Supplementary Figure 3: Bone marrow derived IL1 $\beta$  promotes Wnt signalling and CSC colony formation.** (A) Week 12 but not Week 3 conditioned media from bone marrow used for gene expression arrays stimulated mammosphere formation in MCF7 cells. Mammosphere formation of MCF7 cells following treatment with week 3 and week 12 CM from patients 140, 147 and 148 is shown. (B) Treatment with 100 $\mu$ M of the porcupine inhibitor LGK974 inhibited Wnt signalling from Wnt3A secreting L-cells, as measured by TCF4-driven reporter assay. (C) Fold change in expression

of the top 10 cytokines increased in stimulatory (week 8) CM from non-stimulatory (week 3) CM, as determined by Cytokine Array analysis. (D) ELISA analysis of bone marrow from immune competent (BALB/c) and immune deficient (BALB/c Nude, NOD SCID Gamma (NSG)) mice (n=6-8 per group). Data shown are mean  $\pm$  SD of IL-1 $\beta$  concentrations and are normalised to  $\mu$ g of total protein. (E) Immunohistochemical staining for IL1 $\beta$  in mouse bone sections in immune competent (BALB/c) and immune deficient (NSG) mice. Scale bar 100 $\mu$ M. (F) Treatment with Anakinra significantly reduced mammosphere CSC colony formation in MCF-7 and MDA-MB-231\_BH cells in response to CM. Anakinra did not reduce CSC colony formation in cells treated with control media. All graphs represent mean $\pm$ SEM, \*p<0.05, \*\*p<0.01, \*\*\*p<0.001, \*\*\*\*p<0.0001.

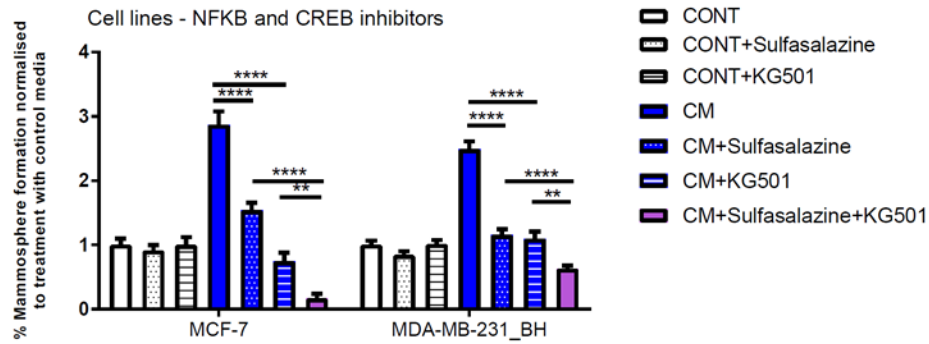

**Supplementary Figure 4: IL1 $\beta$  promotes Wnt signalling in breast cancer cells via an induction in NFKB and CREB.** Inhibiting NFKB using 5mM of sulfasalazine or inhibiting CREB using 10 $\mu$ M of KG501 reversed the induction in mammosphere formation by CM in MCF-7 and MDA-MB-231\_BH cell lines. Sulfasalazine and KG-501 treatment did not reduce mammosphere formation in cells treated with control media. Combined inhibition with Sulfasalazine and KG501 gave further reduction in mammosphere formation than either treatment alone. All graphs represent mean $\pm$ SEM, \* $p$ <0.05, \*\* $p$ <0.01, \*\*\* $p$ <0.001, \*\*\*\* $p$ <0.0001.



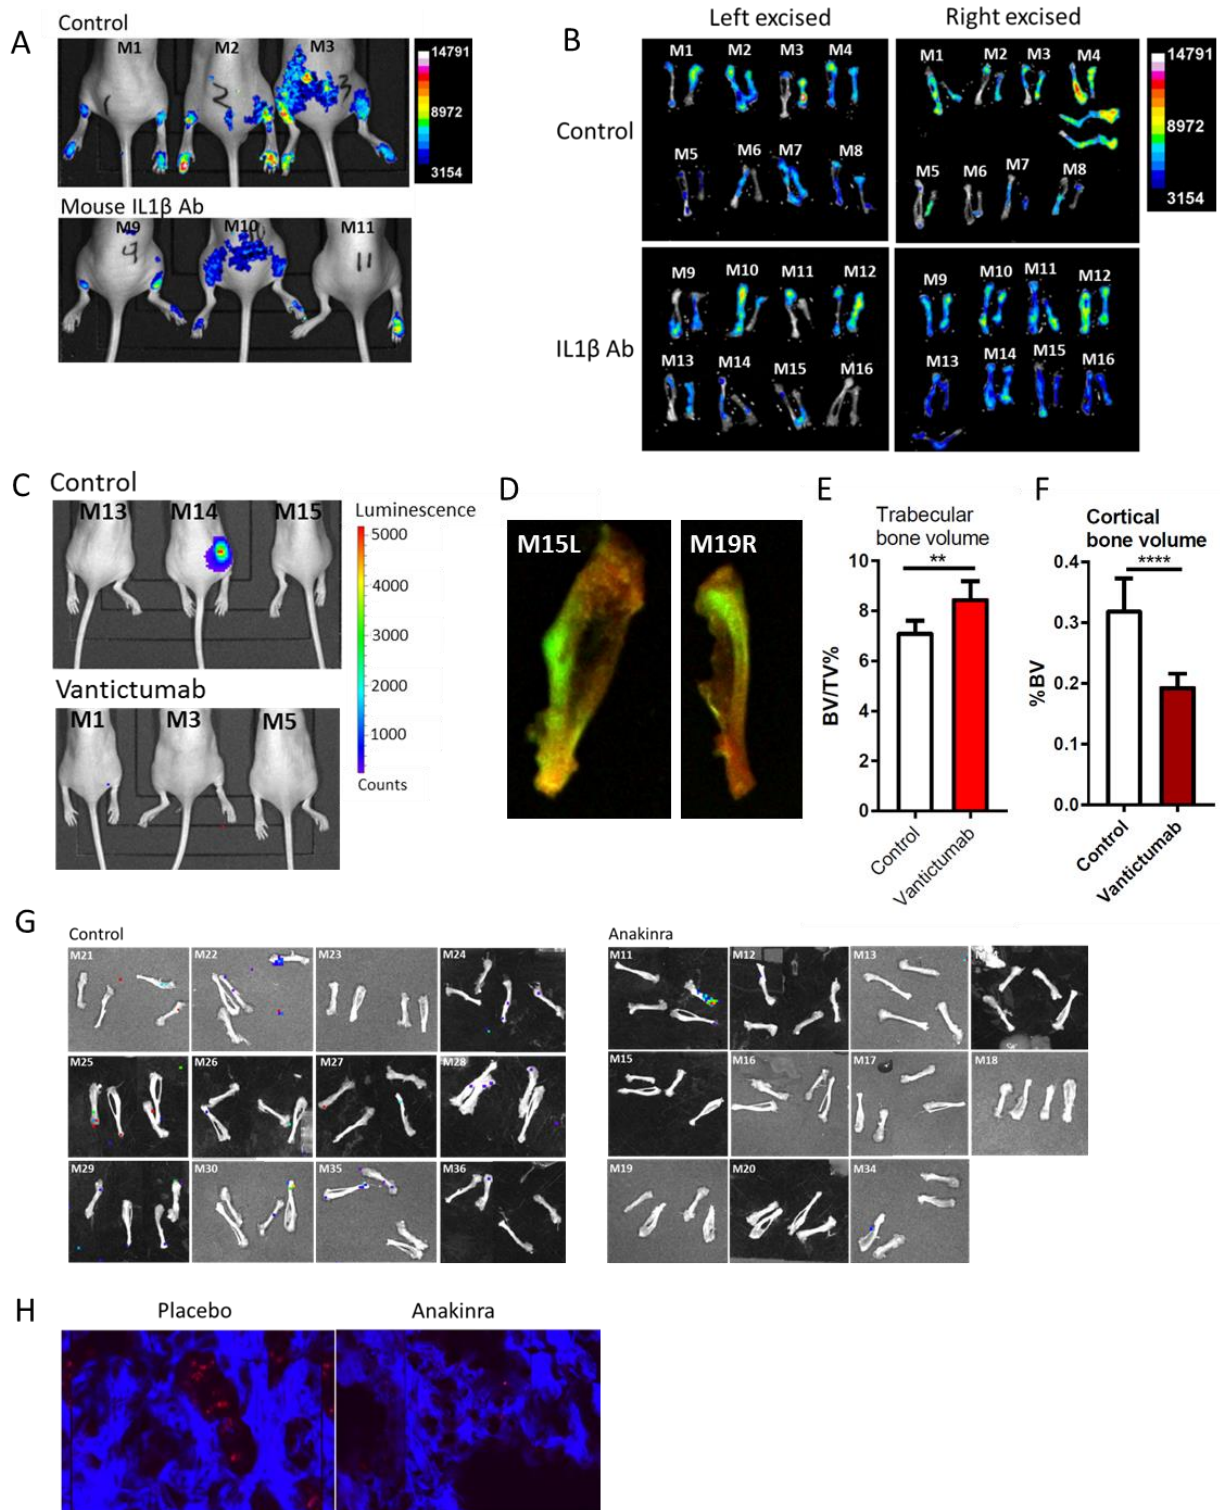

**Supplementary Figure 5: Systemic inhibition of either IL1 $\beta$  or Wnt signalling prevents bone metastasis *in vivo*.** (A) IL1 $\beta$  was inhibited systemically in a spontaneous MDA-MB-231\_BH bone metastatic mouse model with 2mg/kg anti-IL1 $\beta$  antibody for 30 days. Tumour cells were visualised by IVIS *in vivo* imaging prior to termination. Images show example tumours in hind limbs mice in control (M1-M3) vs. IL1 $\beta$  antibody treated (M9-M11) mice after 30 days. Note autofluorescence is observed in mice feet. (B) IVIS images showing excised hind limbs of control vs. IL1 $\beta$  antibody

treated mice at experiment termination. (C) Wnt signalling was inhibited systemically in the MDA-MB-231\_BH bone metastatic model with 15mg/kg Vantictumab for 30 days. Tumour cells were visualised by IVIS in vivo imaging prior to termination. Images show example tumours in hind limbs mice in control (M13-M15) vs. Vantictumab treated (M1, M3, M5) mice after 30 days. (D) Light tools images showing additional tumours identified by GFP expression in excised hind limbs at experiment termination (M15R and M19L). (E) Quantification of trabecular bone volume in control and Vantictumab treated mice. Data is presented as percentage bone volume/total volume (%BV/TV) with 5 femurs scored in the control group and 7 in the Vantictumab treated group. (F) Quantification of cortical bone volume in control and Vantictumab treated mice. Data is presented as % bone volume (%BV) with 6 femurs scored in the control group and 7 in the Vantictumab treated group. (G) IVIS images showing excised hind limbs of control vs. Anakinra treated mice at PDX experiment termination. (H) Two-photon images showing immunohistochemical staining of disseminated tumour cells in placebo and Anakinra treated mice without overt metastases of phycoerythrin conjugated cytokeratin 19 (sc376126) (red) in bone (blue). All graphs represent mean±SEM, \*p<0.05, \*\*p<0.01, \*\*\*p<0.001, \*\*\*\*p<0.0001.

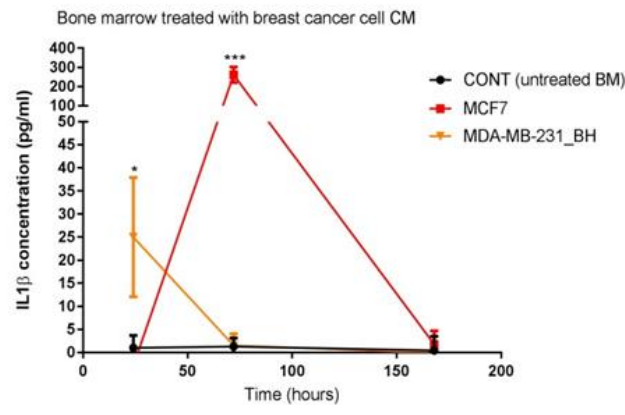

**Supplementary Figure 6: Tumour cell conditioned media promotes IL1 $\beta$  secretion by the bone marrow.** Bone marrow samples growing in culture were treated with either conditioned media from MCF7 cells, conditioned media from MDA-MB-231\_BH cells, or control media. IL1 $\beta$  levels were assessed in these cultures by ELISA at 24 hours, 72 hours, and 7 days after treatment. Increases in IL1 $\beta$  levels were seen following either 72 hours of treatment with MCF7 cell conditioned media (red line;  $p=0.0004$ ), or 24 hours with MDA-MB-231\_BH conditioned media (orange line,  $p=0.0306$ ). \* $p<0.05$ , \*\* $p<0.01$ , \*\*\* $p<0.001$ , \*\*\*\* $p<0.0001$ .

| Patient ID | Gender | Age   |
|------------|--------|-------|
| GU114      | Female | 65    |
| GU116      | Male   | 48    |
| GU120      | Male   | Young |
| GU124      | Female | 74    |
| GU129      | Male   | 39    |
| GU140      | Male   | NA    |
| GU147      | Male   | 61    |
| GU148      | Male   | 54    |
| GU165      | Male   | 76    |
| GU175      | Female | 71    |
| GU176      | Male   | 69    |
| GU177      | NA     | NA    |

**Supplementary Table 1: Characteristics of bone marrow donors used in this study.** Gender and age are presented for each patient where CM was taken from bone marrow in culture. NA; Data not available.

| Patient  | Type         | Grade | ER  | PR  | Her2 | Neoadjuvant Treatment |
|----------|--------------|-------|-----|-----|------|-----------------------|
| BB6RC25  | ILC          | 2     | Pos | Pos | Neg  | None                  |
| BB6RC28  | IDC/<br>DCIS | 3     | Neg | Neg | Neg  | None                  |
| BB6RC52  | IDC          | 3     | Neg | Neg | Neg  | None                  |
| BB6RC53  | IDC          | 2     | Pos | Pos | Neg  | Letrozole             |
| BB6RC64  | ILC          | 2     | Pos | Neg | Neg  | Arimidex              |
| BB6RC66  | IDC          | 2     | Pos | Neg | Neg  | None                  |
| BB6RC72  | IDC          | 3     | Neg | Neg | Neg  | None                  |
| BB6RC80  | IDC          | 2     | Pos | Pos | Neg  | None                  |
| BB6RC86  | IDC          | 3     | Pos | Pos | Neg  | None                  |
| BB6RC87  | IDC/<br>DCIS | 3     | Pos | Neg | Pos  | None                  |
| BB6RC88  | IDC          | 3     | Neg | Pos | Neg  | None                  |
| BB6RC94  | IDC          | 3     | Neg | Neg | Neg  | None                  |
| BB6RC100 | IDC          | 3     | Neg | Neg | Pos  | None                  |
| BB6RC114 | IDC          | 2     | Neg | Neg | Neg  | None                  |
| BB6RC136 | IDC          | 3     | Neg | Neg | Neg  | None                  |
| BB6RC139 | IDC          | 1     | Pos | Pos | Neg  | None                  |
| BB6RC141 | Fung.<br>IMC | NA    | Neg | Neg | Neg  | FEC-T                 |
| BB6RC160 | IDC          | 3     | Pos | Neg | Pos  | Arimidex              |
| BB6RC174 | IDC          | 2     | Pos | Pos | Neg  | Tamoxifen             |
| BB7029   | IDC          | 3     | Pos | Pos | Pos  | None                  |
| BB7030   | IDC          | 2     | Pos | Pos | Neg  | None                  |
| BB7031   | IDC          | 1     | Pos | Pos | Neg  | None                  |
| BB7047   | IDC          | 2     | Pos | Pos | Neg  | None                  |
| BB7056   | IDC          | 2     | Pos | Pos | Neg  | None                  |

**Supplementary Table 2: Characteristics of early patient-derived tumours used in the study.** Breast cancer type, grade, hormone receptor status and neo-adjuvant therapy is presented for each patient included in this study. ILC; invasive lobular carcinoma, IDC; invasive ductal carcinoma, DCIS; Ductal carcinoma in situ, Fung. IMC; fungating invasive mucinous carcinoma, ER; oestrogen receptor, PR; progesterone receptor, Her2; Her2 receptor, Pos; Positive, Neg; Negative, NA; data not available. All patients with Her2 scores of 2+ were confirmed negative by FISH analysis.

| Patient ID | Sample Type | ER  | PR  | Her2 |
|------------|-------------|-----|-----|------|
| BB3RC71    | PE          | Pos | Pos | Pos  |
| BB3RC79    | PE          | Neg | Neg | Neg  |
| BB7007     | Asc         | Pos | Pos | Neg  |
| BB7034     | PE          | Neg | Pos | Pos  |

**Supplementary Table 3. Characteristics of metastatic samples used in this study.** Sample type and hormone receptor status are presented for each patient included in this study. PE; pleural effusion, Asc; Ascitic fluid, ER; oestrogen receptor, PR; progesterone receptor, Her2; Her2 receptor, Pos; Positive, Neg; Negative.
